# Supplementary material for: Designing and evaluating an interprofessional shared decision-making and goal-setting decision aid for patients with diabetes in clinical care - systematic decision aid development and study protocol
Source: PubMed Central journal article supplement (PMC3937124; doi:10.1186/1748-5908-9-16), 2014-01-22
Supplement: 1748-5908-9-16-S3.pdf [file 1748-5908-9-16-S3.pdf]

### Appendix 3: Peer review report form

Please review the decision aid and consider the following questions. Upon completion of the review, please complete the report form.

|                                                                              | Strongly Agree | Neutral | Strongly Disagree |
|------------------------------------------------------------------------------|----------------|---------|-------------------|
| As a whole, does the decision aid accurately represent the evidence to date? | 1              | 2 3     | 4 5               |

Please list and elaborate on components of the decision aid that do not accurately represent the evidence to date:

---

---

|                                                                                                                                    | Strongly Agree | Neutral | Strongly Disagree |
|------------------------------------------------------------------------------------------------------------------------------------|----------------|---------|-------------------|
| As a whole, does the decision aid comprehensively cover all relevant aspects of decision-making and goal-setting in diabetes care? | 1              | 2 3     | 4 5               |

Please list and elaborate on components of the decision aid that do not accurately represent the evidence to date:

---

---

|                                                                                                                        | Strongly Agree | Neutral | Strongly Disagree |
|------------------------------------------------------------------------------------------------------------------------|----------------|---------|-------------------|
| As a whole, does the decision aid present a balanced perspective of decision-making and goal-setting in diabetes care? | 1              | 2 3     | 4 5               |

Please list and elaborate on components of the decision aid that do not present a balanced perspective:

---

---

|                                                     | Strongly Agree | Neutral | Strongly Disagree |
|-----------------------------------------------------|----------------|---------|-------------------|
| As a whole, is the decision aid easy to understand? | 1              | 2 3     | 4 5               |

Please list and elaborate on components of the decision aid that are not easy to understand:

---

---
