# Supplementary material for: Designing and evaluating an interprofessional shared decision-making and goal-setting decision aid for patients with diabetes in clinical care - systematic decision aid development and study protocol
Source: Implement Sci. 2014 Jan 22;9:16. doi: 10.1186/1748-5908-9-16 (PMC3937124; doi:10.1186/1748-5908-9-16)
Supplement: Additional file 1 — Data: Prototypic decision aid. Point of care worksheet, with sample information booklet pages and interactive wheel chart. [file 1748-5908-9-16-S1.pdf]

## Appendix 1: Prototypic decision aid (Point of care worksheet, with sample information booklet pages and interactive wheel chart) (page 1/2)

|                                                                                                                                                                                                                                                                                                                                                                                                                                                                                                                     |                                                                                                                                                                                                                                                                                                                                                                                                                             |
|---------------------------------------------------------------------------------------------------------------------------------------------------------------------------------------------------------------------------------------------------------------------------------------------------------------------------------------------------------------------------------------------------------------------------------------------------------------------------------------------------------------------|-----------------------------------------------------------------------------------------------------------------------------------------------------------------------------------------------------------------------------------------------------------------------------------------------------------------------------------------------------------------------------------------------------------------------------|
| <p>A worksheet to help you pick diabetes goals that are important to you</p> <ul style="list-style-type: none"> <li>Diabetes can be a complicated disease that can keep you and your loved ones busy!</li> <li>This worksheet, and the information booklet that comes with it, can help you and your health care team pick goals that are important to you and strategies to help you get there.</li> <li>With time, your priorities can change, so you can come back to this worksheet again and again!</li> </ul> | <p>First, a little bit about you...</p> <ul style="list-style-type: none"> <li>How beneficial treatments are to you depends on your health. Please fill in the next 3 sentences about yourself:</li> </ul> <ol style="list-style-type: none"> <li>I am ____ years old.</li> <li>I have had diabetes for ____ years</li> <li>I have / have not (circle one) had a heart attack, stroke or blood vessel narrowing.</li> </ol> |
|---------------------------------------------------------------------------------------------------------------------------------------------------------------------------------------------------------------------------------------------------------------------------------------------------------------------------------------------------------------------------------------------------------------------------------------------------------------------------------------------------------------------|-----------------------------------------------------------------------------------------------------------------------------------------------------------------------------------------------------------------------------------------------------------------------------------------------------------------------------------------------------------------------------------------------------------------------------|

|                                                                                                                                                                                                                                                                                                                                                                                                                                                                                                                                                                                                                                                                                                                                                                                                                              |                                                                                                                                                                                                                                                                                                                                                                                                                                                                                                                                                                                                                                                                                                                                                                                                                                                                                                                                                                                                                                                                                                                                                                                                                                                                                                      |
|------------------------------------------------------------------------------------------------------------------------------------------------------------------------------------------------------------------------------------------------------------------------------------------------------------------------------------------------------------------------------------------------------------------------------------------------------------------------------------------------------------------------------------------------------------------------------------------------------------------------------------------------------------------------------------------------------------------------------------------------------------------------------------------------------------------------------|------------------------------------------------------------------------------------------------------------------------------------------------------------------------------------------------------------------------------------------------------------------------------------------------------------------------------------------------------------------------------------------------------------------------------------------------------------------------------------------------------------------------------------------------------------------------------------------------------------------------------------------------------------------------------------------------------------------------------------------------------------------------------------------------------------------------------------------------------------------------------------------------------------------------------------------------------------------------------------------------------------------------------------------------------------------------------------------------------------------------------------------------------------------------------------------------------------------------------------------------------------------------------------------------------|
| <p>What goals are important to you?</p> <ul style="list-style-type: none"> <li>Which <b>general</b> health goals are important to you? (check all that apply)</li> </ul> <div style="display: flex; align-items: center;"> <input type="checkbox"/> Live a long life         <div style="margin-left: 10px;"> </div> </div> <div style="display: flex; align-items: center;"> <input type="checkbox"/> Maintain good function         <div style="margin-left: 10px;"> </div> </div> <div style="display: flex; align-items: center;"> <input type="checkbox"/> Prevent or decrease symptoms         <div style="margin-left: 10px;"> </div> </div> <ul style="list-style-type: none"> <li>If you have checked more than 1, try to think of which is the <b>most</b> important to you and <b>circle</b> this one)</li> </ul> | <p>What goals are important to you?</p> <ul style="list-style-type: none"> <li>What <b>diabetes</b> health goals are important to you? (check all that apply)</li> </ul> <div style="display: flex; align-items: center;"> <input type="checkbox"/> Prevent heart disease         <div style="margin-left: 10px;"> </div> </div> <div style="display: flex; align-items: center;"> <input type="checkbox"/> Prevent stroke         <div style="margin-left: 10px;"> </div> </div> <div style="display: flex; align-items: center;"> <input type="checkbox"/> Prevent foot ulcers &amp; amputation         <div style="margin-left: 10px;"> </div> </div> <div style="display: flex; align-items: center;"> <input type="checkbox"/> Prevent blindness         <div style="margin-left: 10px;"> </div> </div> <div style="display: flex; align-items: center;"> <input type="checkbox"/> Prevent kidney disease         <div style="margin-left: 10px;"> </div> </div> <div style="display: flex; align-items: center;"> <input type="checkbox"/> Prevent nerve damage         <div style="margin-left: 10px;"> </div> </div> <ul style="list-style-type: none"> <li>If you have checked more than 1, try to think of which is the <b>most</b> important to you and <b>circle</b> this one</li> </ul> |
|------------------------------------------------------------------------------------------------------------------------------------------------------------------------------------------------------------------------------------------------------------------------------------------------------------------------------------------------------------------------------------------------------------------------------------------------------------------------------------------------------------------------------------------------------------------------------------------------------------------------------------------------------------------------------------------------------------------------------------------------------------------------------------------------------------------------------|------------------------------------------------------------------------------------------------------------------------------------------------------------------------------------------------------------------------------------------------------------------------------------------------------------------------------------------------------------------------------------------------------------------------------------------------------------------------------------------------------------------------------------------------------------------------------------------------------------------------------------------------------------------------------------------------------------------------------------------------------------------------------------------------------------------------------------------------------------------------------------------------------------------------------------------------------------------------------------------------------------------------------------------------------------------------------------------------------------------------------------------------------------------------------------------------------------------------------------------------------------------------------------------------------|

|                                                                                                                                                                                                                                                                                                                                                                                                                                                                                                                                                                                                                                                                                                                                                                                                                          |                                                                                                                                                                                                                                                                                                                                                                                                                                    |
|--------------------------------------------------------------------------------------------------------------------------------------------------------------------------------------------------------------------------------------------------------------------------------------------------------------------------------------------------------------------------------------------------------------------------------------------------------------------------------------------------------------------------------------------------------------------------------------------------------------------------------------------------------------------------------------------------------------------------------------------------------------------------------------------------------------------------|------------------------------------------------------------------------------------------------------------------------------------------------------------------------------------------------------------------------------------------------------------------------------------------------------------------------------------------------------------------------------------------------------------------------------------|
| <p>There are many things that you can do to reach these goals:</p> <ul style="list-style-type: none"> <li><input type="checkbox"/> Connect with your health care team</li> <li><input type="checkbox"/> Get blood and urine tests</li> <li><input type="checkbox"/> Stop smoking</li> <li><input type="checkbox"/> Control your blood sugars</li> <li><input type="checkbox"/> Lower your blood pressure</li> <li><input type="checkbox"/> Lower your cholesterol</li> <li><input type="checkbox"/> Take ASA</li> <li><input type="checkbox"/> Check your feet</li> </ul> <ul style="list-style-type: none"> <li>The benefits &amp; downsides of each of these are described in the information booklet that comes with this worksheet; the tabs are coded with the symbol of the goal you are interested in.</li> </ul> | <p>The strategy that you pick can achieve more than one goal</p> <ul style="list-style-type: none"> <li>For example, choosing to lower your blood pressure may help you             <ul style="list-style-type: none"> <li>– Live a long life</li> <li>– Maintain your activities</li> <li>– Prevent heart disease</li> <li>– Prevent stroke</li> <li>– Prevent blindness</li> <li>– Prevent kidney failure</li> </ul> </li> </ul> |
|--------------------------------------------------------------------------------------------------------------------------------------------------------------------------------------------------------------------------------------------------------------------------------------------------------------------------------------------------------------------------------------------------------------------------------------------------------------------------------------------------------------------------------------------------------------------------------------------------------------------------------------------------------------------------------------------------------------------------------------------------------------------------------------------------------------------------|------------------------------------------------------------------------------------------------------------------------------------------------------------------------------------------------------------------------------------------------------------------------------------------------------------------------------------------------------------------------------------------------------------------------------------|

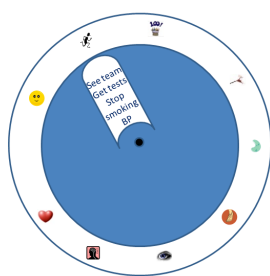

|                                                                       | General Goals    |                   |                            | Diabetes-Specific Goals |                |                                  |                   |                        |                      |
|-----------------------------------------------------------------------|------------------|-------------------|----------------------------|-------------------------|----------------|----------------------------------|-------------------|------------------------|----------------------|
| Diabetes-specific management strategies (sub-heading for each = recs) | Live a long life | Maintain function | Prevent or reduce symptoms | Prevent heart disease   | Prevent stroke | Prevent foot ulcers & amputation | Prevent blindness | Prevent kidney failure | Prevent nerve damage |
| See my health care team                                               |                  | ✓                 | ✓                          |                         |                | ✓                                | ✓                 |                        |                      |
| Get blood and urine tests                                             | ✓                | ✓                 | ✓                          |                         |                |                                  |                   | ✓                      |                      |
| Check my feet                                                         |                  |                   |                            |                         |                | ✓                                |                   |                        |                      |
| Stop smoking                                                          | ✓                | ✓                 | ✓                          | ✓                       | ✓              | ✓                                |                   |                        |                      |
| Lower my blood sugars<br>- Diet/ex/weight/check/med                   | ✓                |                   | ✓                          | ✓                       |                |                                  | ✓                 | ✓                      | ✓                    |
| Lower my blood pressure<br>- Diet/ex/weight/med/check/ACBARS          | ✓                | ✓                 | ✓                          | ✓                       | ✓              |                                  | ✓                 | ✓                      |                      |
| Lower my cholesterol<br>- Diet/ex/weight/med/Statins                  | ✓                | ✓                 | ✓                          | ✓                       | ✓              |                                  | ✓                 |                        |                      |
| Take aspirin                                                          |                  |                   |                            |                         |                |                                  |                   |                        |                      |

And here's how diet, exercise, weight loss and taking medications can help with your goals:

|                  | Lower blood pressure | Lower cholesterol | Lower blood glucose | Lose weight |
|------------------|----------------------|-------------------|---------------------|-------------|
| Diet             | ✓                    | ✓                 | ✓                   | ✓           |
| Exercise         | ✓                    | ✓                 | ✓                   | ✓           |
| Lose weight      | ✓                    | ✓                 | ✓                   |             |
| Take medications | ✓                    | ✓                 | ✓                   |             |

|                                                                                                                                                                                                                                                                                                                                                                                                                                                                                                                                                                                                                                                                                                                   |                                                                                                                                                                                                                                                                                                                                                                                                                                                                                                                                                                                                                                                                                          |
|-------------------------------------------------------------------------------------------------------------------------------------------------------------------------------------------------------------------------------------------------------------------------------------------------------------------------------------------------------------------------------------------------------------------------------------------------------------------------------------------------------------------------------------------------------------------------------------------------------------------------------------------------------------------------------------------------------------------|------------------------------------------------------------------------------------------------------------------------------------------------------------------------------------------------------------------------------------------------------------------------------------------------------------------------------------------------------------------------------------------------------------------------------------------------------------------------------------------------------------------------------------------------------------------------------------------------------------------------------------------------------------------------------------------|
| <p>Which of the following goals are most important to you today?</p> <p>(check all that apply)</p> <ul style="list-style-type: none"> <li><input type="checkbox"/> Live a long life</li> <li><input type="checkbox"/> Maintain good function</li> <li><input type="checkbox"/> Prevent or decrease symptoms</li> <li><input type="checkbox"/> Prevent heart disease</li> <li><input type="checkbox"/> Prevent stroke</li> <li><input type="checkbox"/> Prevent foot ulcers &amp; amputation</li> <li><input type="checkbox"/> Prevent blindness</li> <li><input type="checkbox"/> Prevent kidney disease</li> <li><input type="checkbox"/> Prevent nerve damage</li> <li><input type="checkbox"/> None</li> </ul> | <p>What strategies do you want to do now?</p> <p>Based on your goals, and balancing the benefits and downsides described in the booklet, what strategy do you want to do now?</p> <ul style="list-style-type: none"> <li><input type="checkbox"/> Connect with your health care team</li> <li><input type="checkbox"/> Get blood and urine tests</li> <li><input type="checkbox"/> Stop smoking</li> <li><input type="checkbox"/> Control your blood sugars</li> <li><input type="checkbox"/> Lower your blood pressure</li> <li><input type="checkbox"/> Lower your cholesterol</li> <li><input type="checkbox"/> Take ASA</li> <li><input type="checkbox"/> Check your feet</li> </ul> |
|-------------------------------------------------------------------------------------------------------------------------------------------------------------------------------------------------------------------------------------------------------------------------------------------------------------------------------------------------------------------------------------------------------------------------------------------------------------------------------------------------------------------------------------------------------------------------------------------------------------------------------------------------------------------------------------------------------------------|------------------------------------------------------------------------------------------------------------------------------------------------------------------------------------------------------------------------------------------------------------------------------------------------------------------------------------------------------------------------------------------------------------------------------------------------------------------------------------------------------------------------------------------------------------------------------------------------------------------------------------------------------------------------------------------|

| Now you're ready to set your goals |                                |                                     |
|------------------------------------|--------------------------------|-------------------------------------|
| My goal                            | Where I am now                 | Where I want to be                  |
| Prevent a stroke                   | Had a mini-stroke 2 months ago | Prevent another stroke              |
| Lower my blood pressure            | 145/92                         | Lower my blood pressure to < 130/80 |
|                                    |                                |                                     |

| What strategies are you going to use?     |                                                 |                                                     |
|-------------------------------------------|-------------------------------------------------|-----------------------------------------------------|
| In <u>3</u> month(s): (pick a time frame) |                                                 |                                                     |
| How I'm going to reach my goal            | What I'm doing now                              | What I will do                                      |
| Take ASA                                  | Not yet taking ASA                              | Take 81 mg of ASA every day                         |
| Lower my blood pressure to < 130/80       | Not adding salt<br>Already taking ramipril 5 mg | Cut out ham<br>Increase ramipril to 10 mg every day |
|                                           |                                                 |                                                     |

**Appendix 1: Prototypic decision aid** (Point of care worksheet, with sample information booklet pages and interactive wheel chart) (page 2/2)

|                                                                                                                                                                                                                                                   |                                                                                                                                                                                                                                                                                                                                                                                                   |
|---------------------------------------------------------------------------------------------------------------------------------------------------------------------------------------------------------------------------------------------------|---------------------------------------------------------------------------------------------------------------------------------------------------------------------------------------------------------------------------------------------------------------------------------------------------------------------------------------------------------------------------------------------------|
| <p>Sample information book page</p> <p><b>Lower my cholesterol</b></p> <p>What is your risk of having a heart attack in the next 10 years?</p> <p>[illustrative graphic &amp; text]</p> <p>Lower cholesterol<br/>Lower blood pressure</p>         | <p>Sample information book page</p> <p><b>Lower my cholesterol</b></p> <ul style="list-style-type: none"> <li>There are 3 ways to lower your cholesterol.               <ol style="list-style-type: none"> <li>Diet</li> <li>Exercise</li> <li>Statin</li> </ol> </li> <li>Each of these ways have their own benefits and downsides.</li> </ul> <p>Lower cholesterol<br/>Lower blood pressure</p> |
| <p>Sample information book page</p> <p><b>Lower my cholesterol</b></p> <p>What <i>benefit</i> can you expect from changing your <b>diet</b>?</p> <p>[illustrative graphic &amp; text]</p> <p>Lower cholesterol<br/>Lower blood pressure</p>       | <p>Sample information book page</p> <p><b>Lower my cholesterol</b></p> <p>What <i>downsides</i> can you expect from changing your <b>diet</b>?</p> <p>[illustrative graphic &amp; text]</p> <p>Lower cholesterol<br/>Lower blood pressure</p>                                                                                                                                                     |
| <p>Sample information book page</p> <p><b>Lower my cholesterol</b></p> <p>What <i>benefit</i> can you expect from increasing your <b>activity</b>?</p> <p>[illustrative graphic &amp; text]</p> <p>Lower cholesterol<br/>Lower blood pressure</p> | <p>Sample information book page</p> <p><b>Lower my cholesterol</b></p> <p>What <i>downsides</i> can you expect from increasing your <b>activity</b>?</p> <p>[illustrative graphic &amp; text]</p> <p>Lower cholesterol<br/>Lower blood pressure</p>                                                                                                                                               |
| <p>Sample information book page</p> <p><b>Lower my cholesterol</b></p> <p>What benefit can you expect from taking statins?</p> <p>[illustrative graphic &amp; text]</p> <p>Lower cholesterol<br/>Lower blood pressure</p>                         | <p>Sample information book page</p> <p><b>Lower my cholesterol</b></p> <p>What downsides can you expect from taking statins?</p> <p>[illustrative graphic &amp; text]</p> <p>Lower cholesterol<br/>Lower blood pressure</p>                                                                                                                                                                       |
